# Supplementary material for: Targeted NIR-responsive theranostic immuno-nanomedicine combined TLR7 agonist with immune checkpoint blockade for effective cancer photothermal immunotherapy
Source: Royal Society of Chemistry journal article supplement (doi:10.1039/d2tb01195f), 2022-01-01
Supplement: d2tb01195f1.pdf [file d2tb01195f1.pdf]

## Supporting Information

### Targeted NIR-Responsive Theranostic Immuno-Nanomedicine Combined TLR7 agonist with Immune Checkpoint Blockade for Effective Cancer Photothermal Immunotherapy

Vellingiri Yasothamani<sup>1</sup>, Raju Vivek, <sup>1,\*</sup>

<sup>1</sup>Bio-Nano Therapeutics Research Laboratory, Cancer Research Program (CPR), Department of Zoology, School of Life Science, Bharathiar University, Coimbatore 641 046, India.

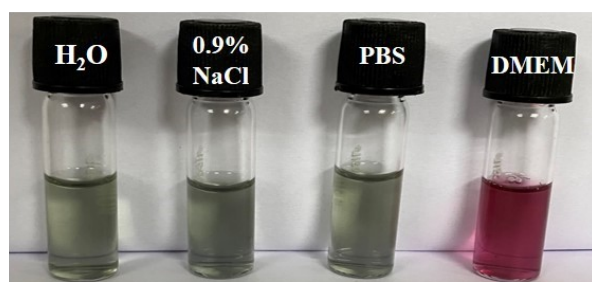

**Figure S1:** Stability of NPs in different physiological solution of water, NaCl, PBS, and DMEM.

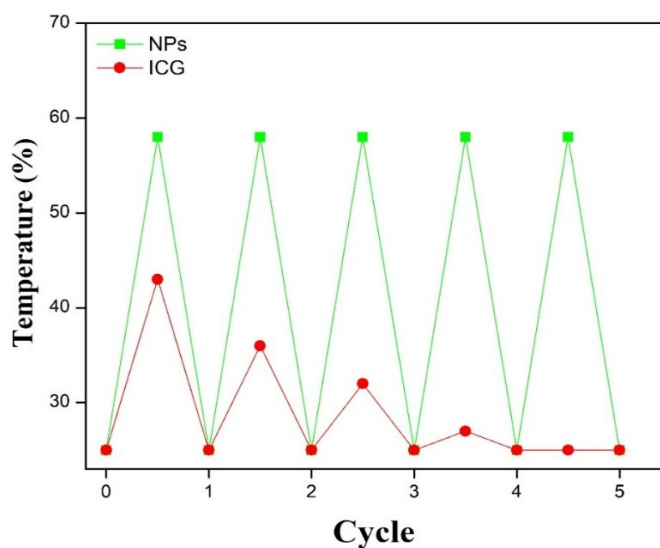

**Figure S2:** Stability of NPs Compared with ICG under NIR light irradiation of five on-off cycles.

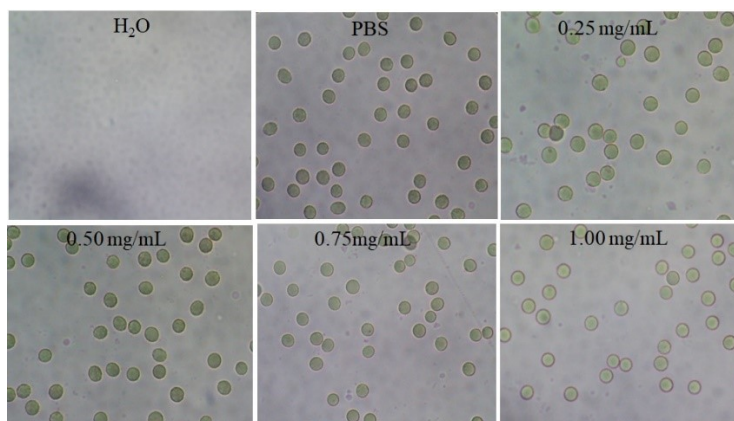

**Figure S3:** Hemolysis assay of NPs in various concentration in RBC images.

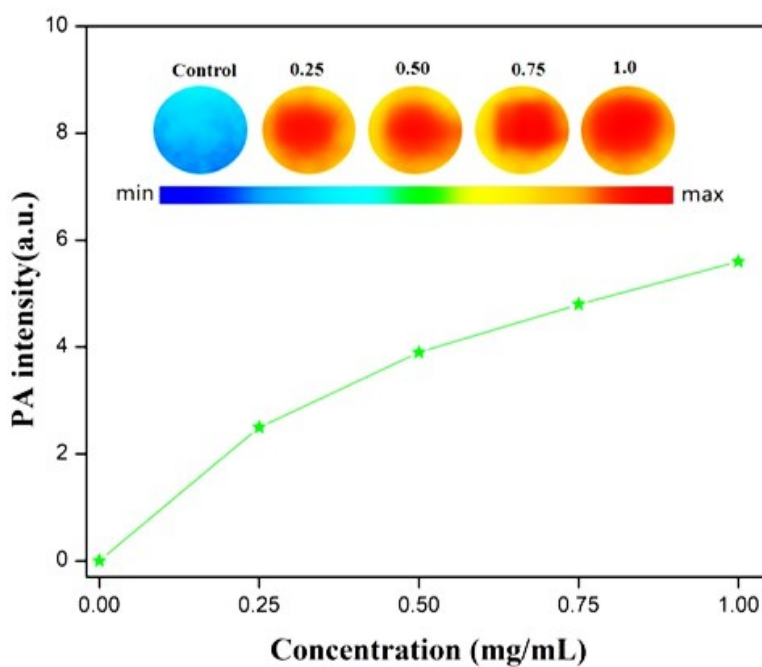

**Figure S4:** In vitro photoacoustic properties of NPs with PA images and corresponding PA signal intensities of NPs solutions with various concentrations based photoacoustic imaging intensity.
